# Supplementary material for: Anion-directed structural tuning of two azomethine-derived Zn2+ complexes with optoelectronic recognition of Cu2+ in aqueous medium with anti-cancer activities: from micromolar to femtomolar sensitivity with DFT revelation
Source: Royal Society of Chemistry journal article supplement (doi:10.1039/d3dt01901b), 2023-01-01
Supplement: d3dt01901b1.pdf [file d3dt01901b1.pdf]

## Supporting Information File

### **Anion directed structural tuning of azomethine derived two Zn<sup>2+</sup>-complexes with optoelectronic recognition of Cu<sup>2+</sup> from aqueous medium with Anti-cancer activities: Expedition from micromolar to femtomolar sensitivity with DFT revelation**

Nithun Ranjan Pandit,<sup>‡ [a]</sup> Sourav Bej,<sup>‡ [bc]</sup> Riyanka Das,<sup>‡ [bc]</sup> Nirajan Ghosal<sup>[d]</sup>, Ananya Mondal<sup>[a][e]</sup>, Ranjana Pal<sup>[d]</sup>, Meenakshi Ghosh<sup>[e]</sup>, Priyabrata Banerjee,<sup>‡ [bc]</sup> Biplab Biswas<sup>‡ [a]</sup>

a. Department of Chemistry, Presidency University, 86/1, College Street, Kolkata 700073, India.

b. Electric Mobility and tribology research Group, CSIR-Central Mechanical Engineering Research Institute, Mahatma Gandhi Avenue, Durgapur, 713209, India.

c. Academy of Scientific & Innovative Research (AcSIR), Ghaziabad-201002, Uttar Pradesh, India

d. Department of Life Sciences, Presidency University, 86/1, College Street, Kolkata 700073, India.

e. Department of Chemistry, Vidyasagar College for Women, 39 Sankar Ghosh Lane, Kolkata-6, India.

‡ Present Address : School of Science, Harbin Institute of Technology (Shenzhen), Shenzhen 518055, China

Corresponding authors: Dr Biplab Biswas: E-mail: [biplab.chem@presiuniv.ac.in](mailto:biplab.chem@presiuniv.ac.in),  
<http://presiuniv.ac.in/web/>; Tel: +919734246721&Dr Priyabrata Banerjee: E-mail:  
[pr\\_banerjee@cmeri.res.in](mailto:pr_banerjee@cmeri.res.in), [priyabrata\\_banerjee@yahoo.co.in](mailto:priyabrata_banerjee@yahoo.co.in);

Web: [www.cmeri.res.in](http://www.cmeri.res.in), [www.priyabratabanerjee.in](http://www.priyabratabanerjee.in); Tel: +91-9433814081

‡ NRP, SB and RD contributed equally as first author to this paper

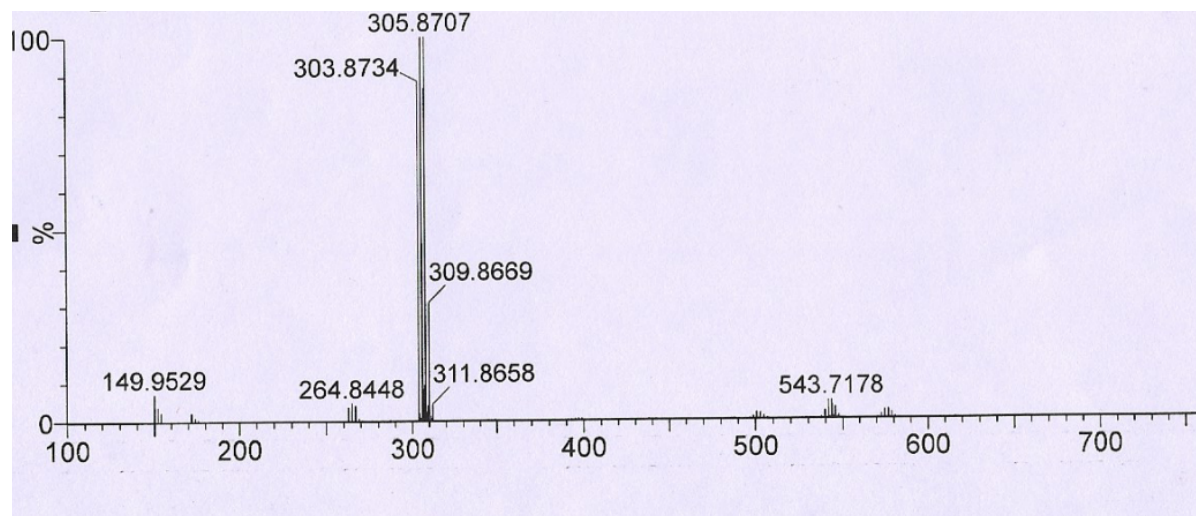

**Figure S1:** Mass spectrometric data of NS-1

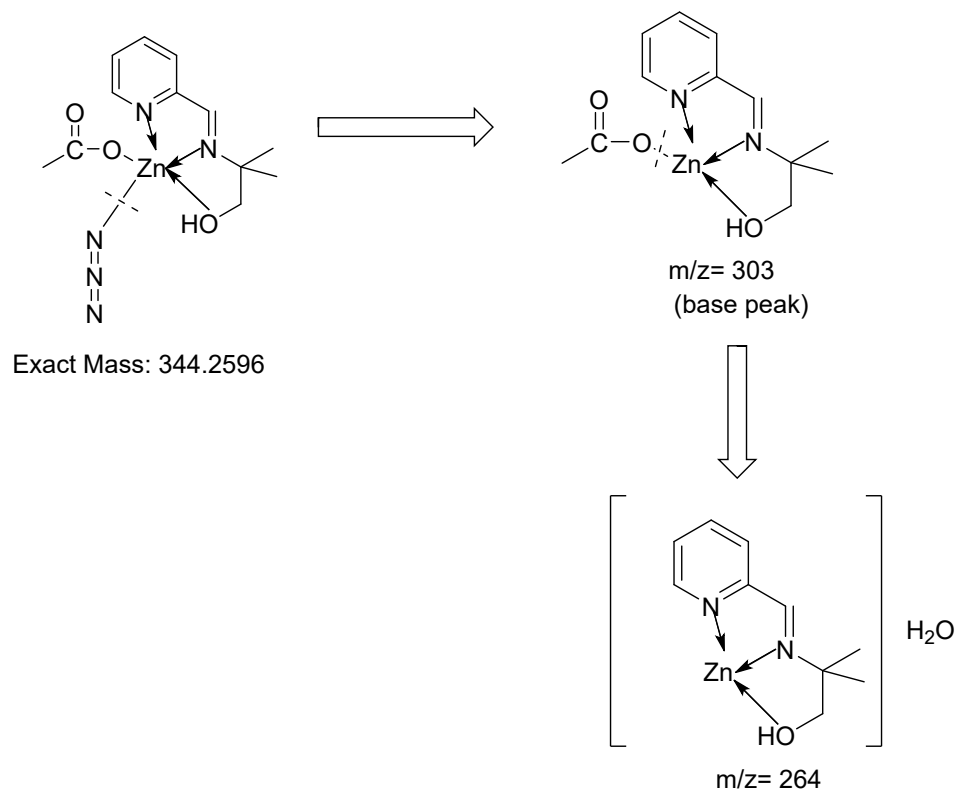

**Scheme S1:** Probable Mass spectrometric analysis of NS-1

(A) BB\_NRP\_AM\_204\_1H

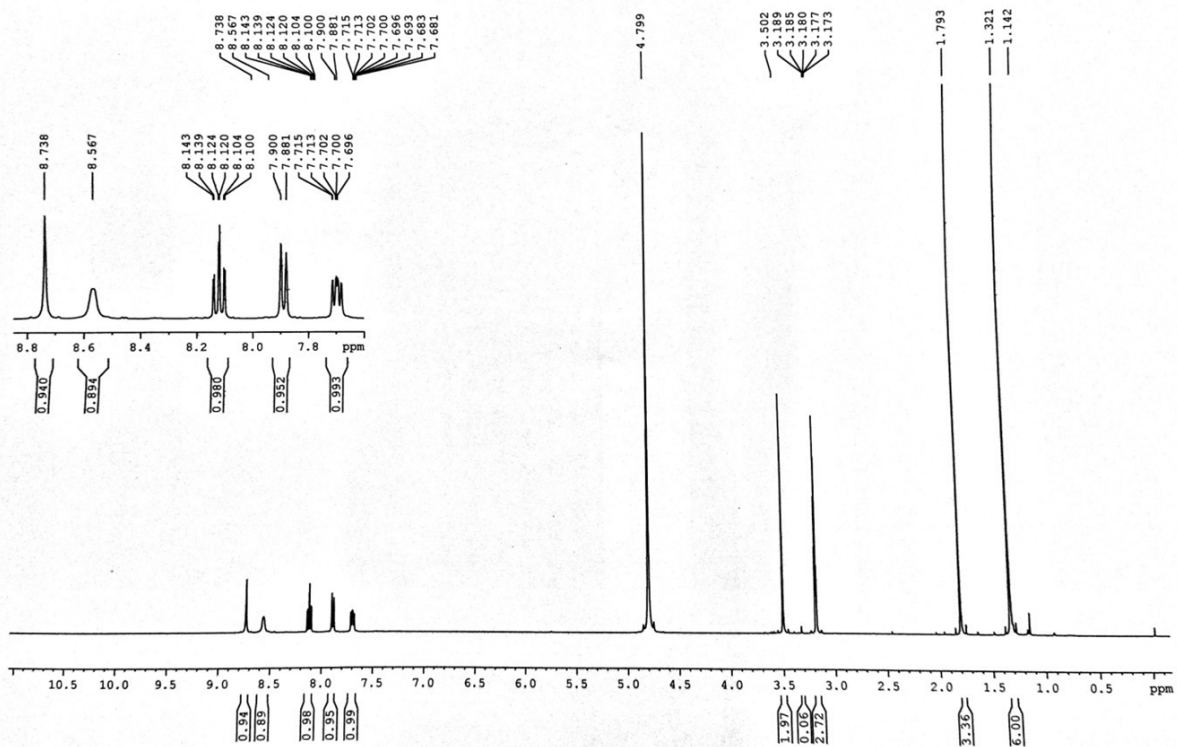

Figure S2: (A) <sup>1</sup>H-NMR spectra of NS-1

<sup>1</sup>H-NMR(400 MHz, D<sub>2</sub>O): 1H, s, 8.74 ppm (H<sub>d</sub>), 1H, d, 8.57 ppm(H<sub>h</sub>), 1H, dd, 8.10-8.14 ppm (H<sub>g</sub>), J= 16Hz, 1H, d, 7.88-7.90 ppm, J= 8 Hz, (H<sub>e</sub>), 1H, dd, 7.70-7.72 ppm, J= 8 Hz (H<sub>f</sub>), 2H, s, 3.50 ppm(H<sub>b</sub>), 3H, s, 1.79 ppm (H<sub>i</sub>), 6H, s, 1.32 ppm (H<sub>c</sub>).

(B)

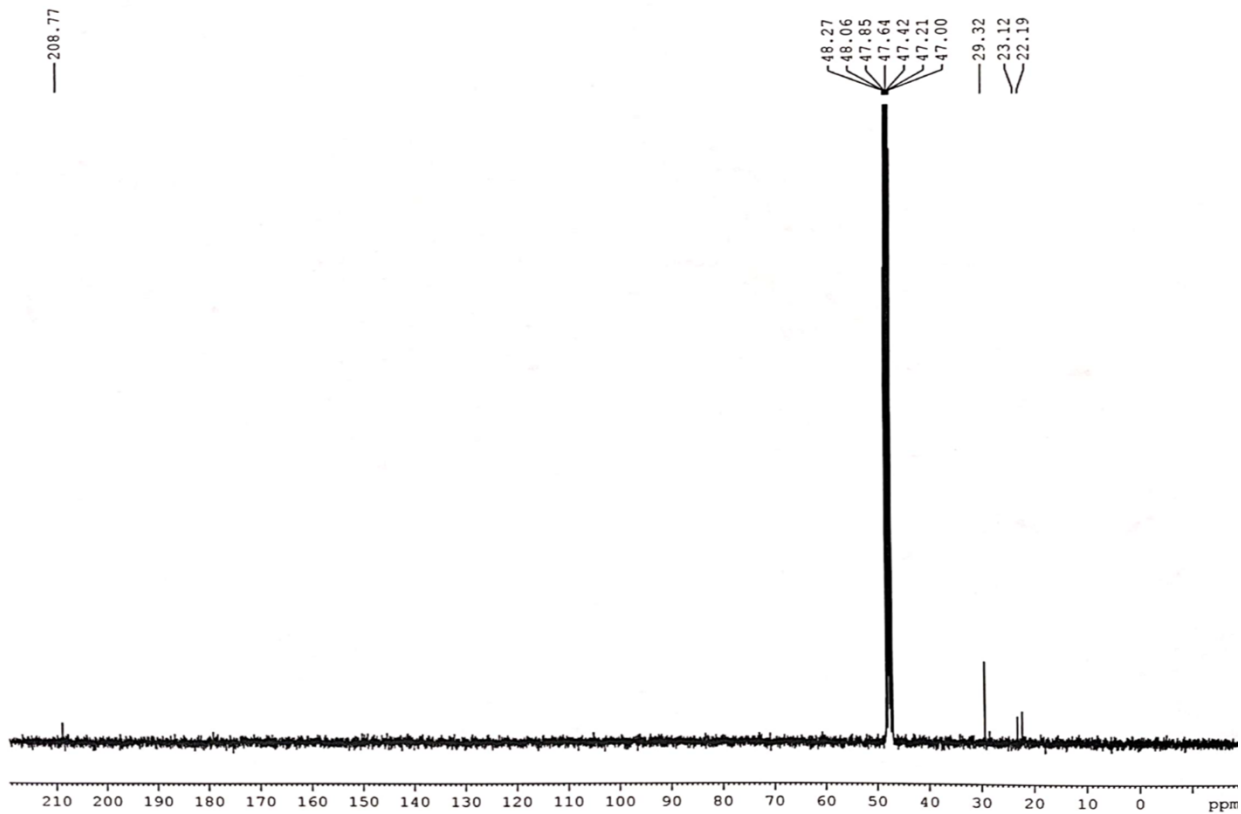

Figure S2: (B)  $^{13}\text{C}$ -NMR spectra of NS-1

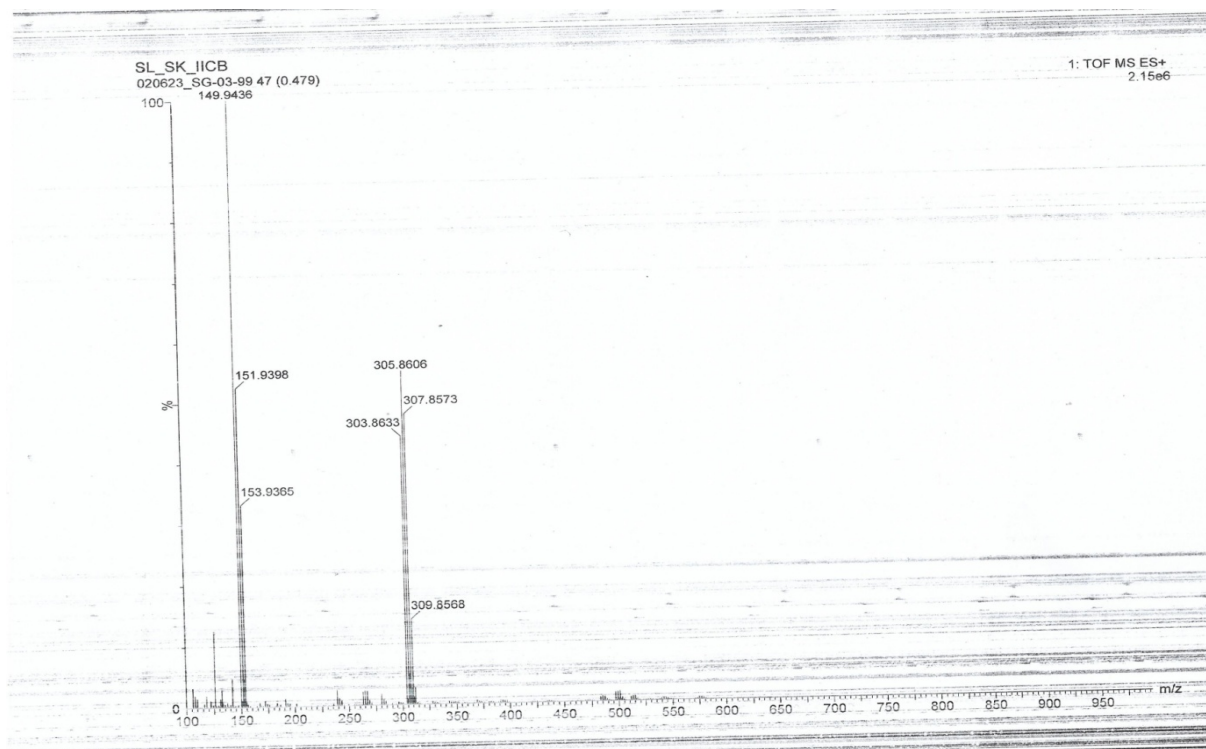

Figure S3: HR-MS data of NS-2

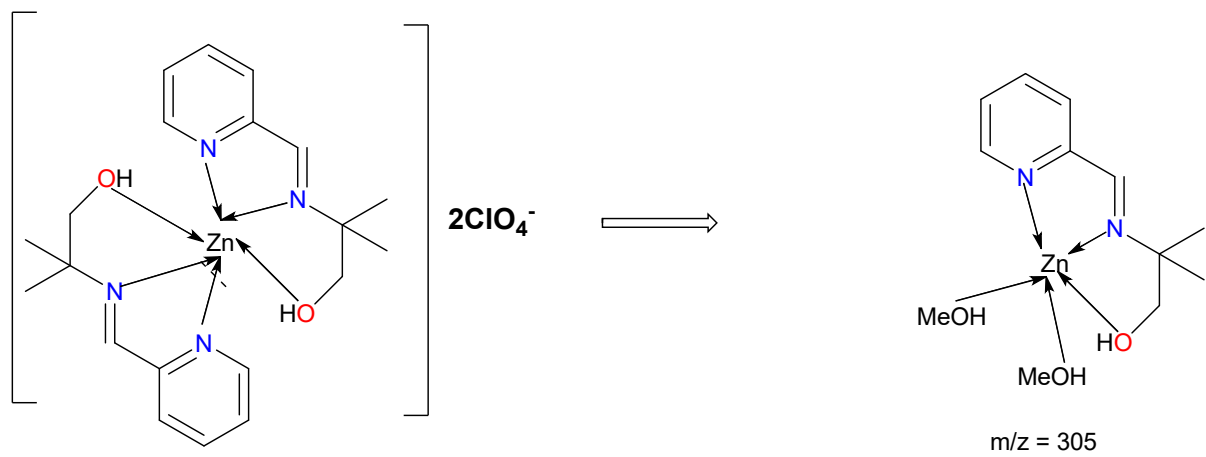

Scheme S2: Probable Mass spectrometric analysis of NS-2

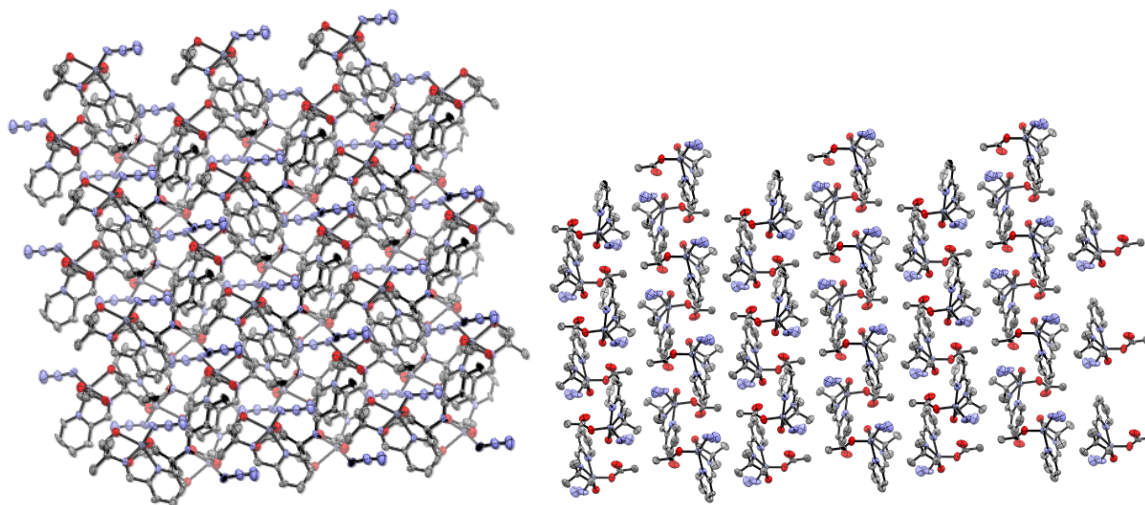

**Figure S4:** packing of the complex **NS-1** in different directions.

**Table S1:** Bond length associated with the hydrogen bonding of the complex **NS-1**

| Bond         | Distance |
|--------------|----------|
| O(1)----O(3) | 2.571(2) |

**Table S2:** Selected bond lengths around the coordination environment of the complex **NS-1**

| Bonds      | Distance (in Å°) |
|------------|------------------|
| Zn(1)-N(1) | 2.20(1)          |
| Zn(1)-N(2) | 2.07(1)          |
| Zn(1)-N(3) | 1.95(2)          |
| Zn(1)-O(1) | 2.22(1)          |
| Zn(1)-O(2) | 1.95(1)          |

**Table S3:** Bond length associated with the Schiff base of the complex **NS-1**

| Bond      | Distance |
|-----------|----------|
| C(6)-N(2) | 1.26(2)  |

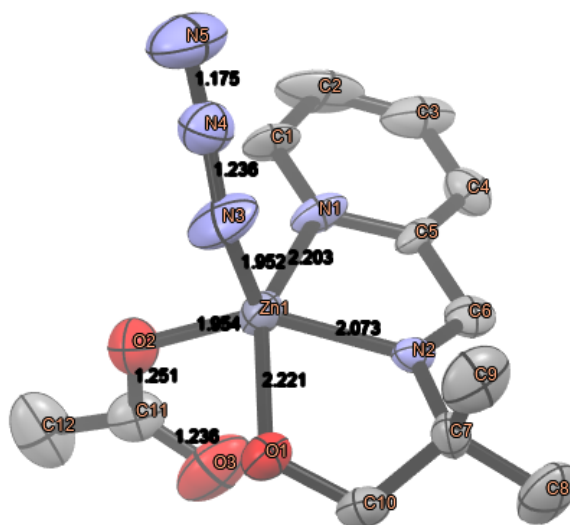

**Figure S5:** Selected bond lengths around the coordination environment of the complex **NS-1**

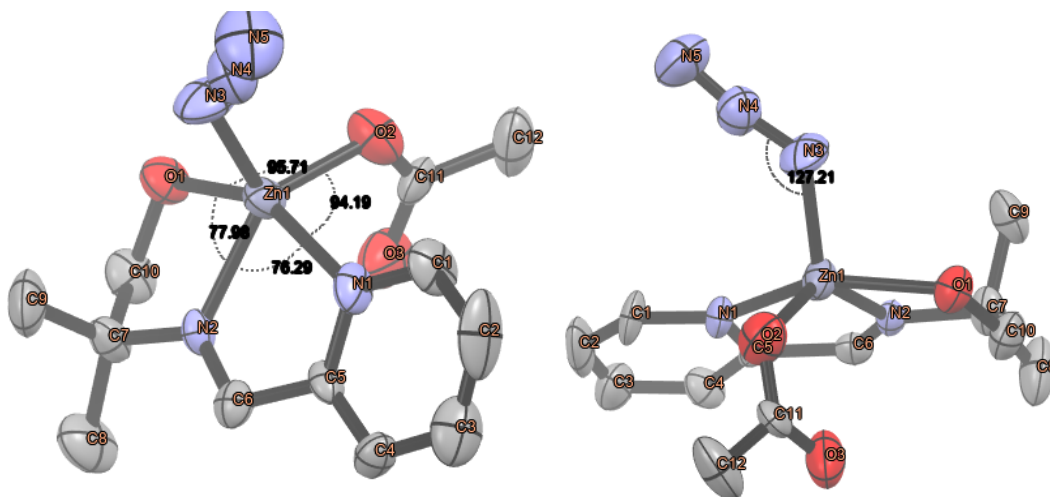

**Figure S6:** Selected bond angles around the coordination environment of the complex **NS-1**

**Table S4:** Selected bond angles around the coordination environment of complex **NS-1**

| Bond              | Angles in degree |
|-------------------|------------------|
| N(2)- Zn (1)-N(1) | 76.29            |
| N(1)- Zn (1)-O(2) | 94.13            |
| O(1)-Zn(1)-N(2)   | 77.96            |
| N(3)- Zn (1)-O(2) | 91.86            |
| O(2)-Zn(1)-O(1)   | 96.71            |

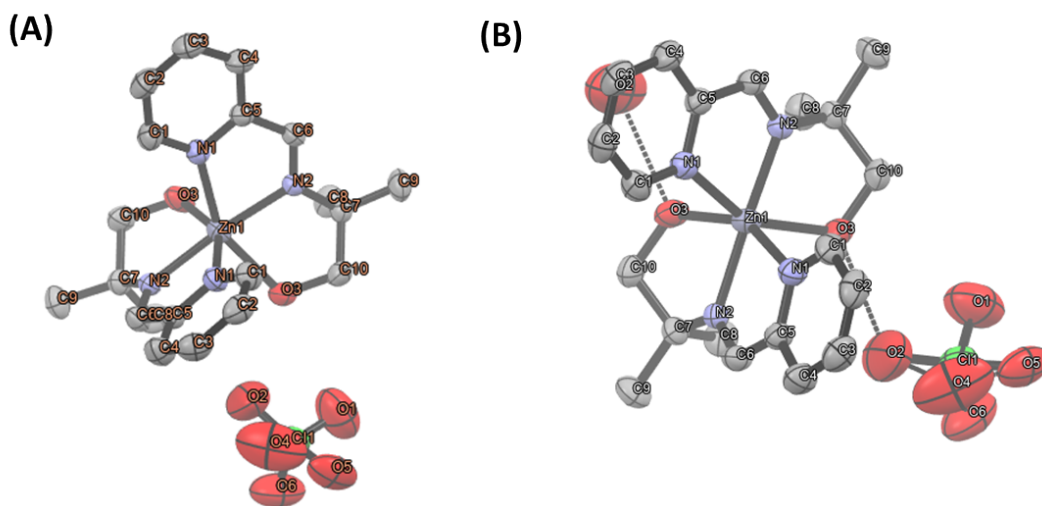

**Figure S7:** (A) X-ray structure of the complex **NS-2** (B) Hydrogen bonding network of **NS-2**

**Table S7:** Bond lengths associated with the hydrogen bonding of the complex **NS-2**

| Bond         | Distance |
|--------------|----------|
| O(2)----O(3) | 2.824(9) |



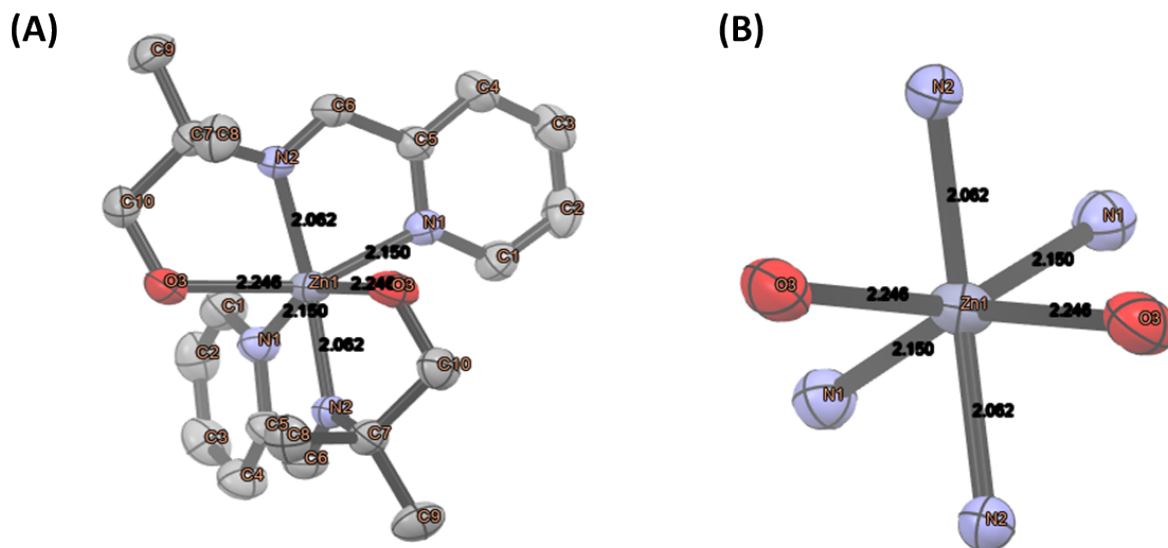

**Figure S8: (A)** Selected bond lengths around the coordination environment of the complex **NS-2** **(B)** Enlarged coordination view of **NS-2**.

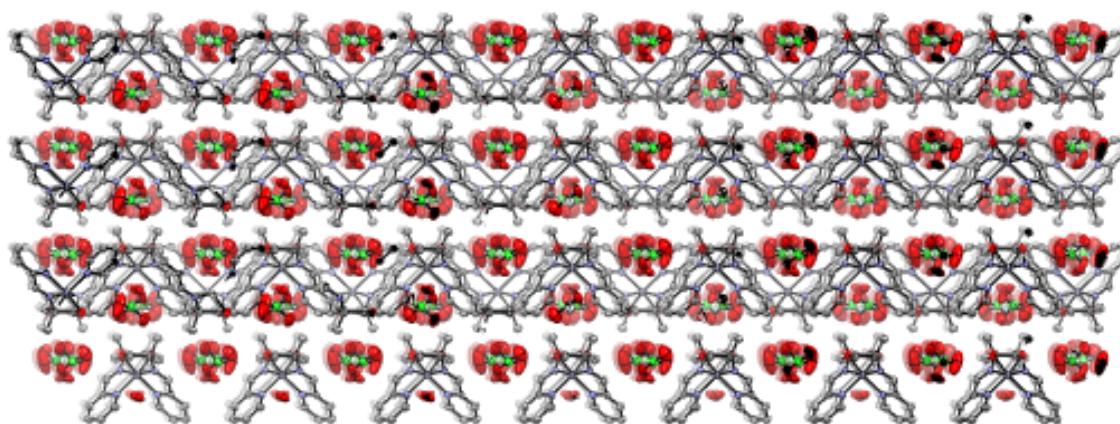

**Figure S9:** packing of the complex **NS-2**.

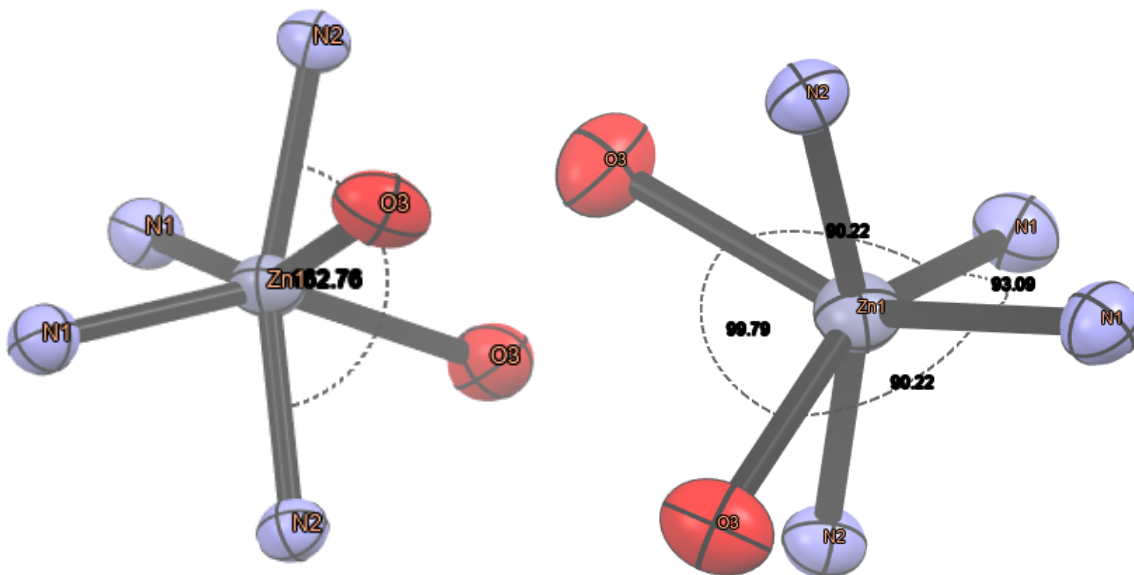

**Figure S10:** Selected bond angles around the coordination environment of the complex **NS-2**.

**Table S8:** Selected bond lengths around the coordination environment of the complex **NS-2**

| Bonds      | Distance (in Å) |
|------------|-----------------|
| Zn(1)-N(2) | 2.062           |
| Zn(1)-N(1) | 2.150           |
| Zn(1)-O(3) | 2.246           |

**Table S9:** Bond angle associated with the Schiff base of the complex **NS-2**

| Bond      | Distance |
|-----------|----------|
| C(6)-N(2) | 1.259(5) |

**Table S10:** Selected bond angles around the coordination environment of complex **NS-2**

| Bond            | Angles in degree |
|-----------------|------------------|
| N(1)-Zn(1)-N(1) | 93.06            |
| O(3)-Zn(1)-O(1) | 90.79            |
| N(1)-Zn(1)-O(3) | 90.22            |

**Table S11:** crystallographic parameters of **NS-1** and **NS-2**

| Complex                                       | NS-1                                                            | NS-2                                                                                   |
|-----------------------------------------------|-----------------------------------------------------------------|----------------------------------------------------------------------------------------|
| Formula                                       | C <sub>12</sub> H <sub>17</sub> N <sub>5</sub> ZnO <sub>3</sub> | C <sub>20</sub> H <sub>28</sub> N <sub>4</sub> O <sub>2</sub> Zn, 2(ClO <sub>4</sub> ) |
| Formula Weight                                | 343.67                                                          | 620.75                                                                                 |
| Temperature (K)                               | 293                                                             | 273                                                                                    |
| Crystal System                                | Orthorhombic                                                    | Monoclinic                                                                             |
| Space group                                   | P 2 <sub>1</sub> 2 <sub>1</sub> 2 <sub>1</sub>                  | P 2/n                                                                                  |
| <i>a</i> (Å)                                  | 9.508(7)                                                        | 10.7236(8)                                                                             |
| <i>b</i> (Å)                                  | 9.719(7)                                                        | 7.8448(6)                                                                              |
| <i>c</i> (Å)                                  | 16.852(13)                                                      | 15.7025(12)                                                                            |
| $\alpha$ (°)                                  | 90                                                              | 90                                                                                     |
| $\beta$ (°)                                   | 90                                                              | 96.744(3)°                                                                             |
| $\gamma$ (°)                                  | 90                                                              | 90                                                                                     |
| Z                                             | 4                                                               | 2                                                                                      |
| <i>d</i> <sub>cal</sub> (g cm <sup>-3</sup> ) | 1.466                                                           | 1.571                                                                                  |
| $\mu$ (mm <sup>-1</sup> )                     | 1.593                                                           | 1.199                                                                                  |
| F(000)                                        | 708.0                                                           | 640.0                                                                                  |
| Total reflection                              | 10775                                                           | 19282                                                                                  |

|                                   |                |                |
|-----------------------------------|----------------|----------------|
| Unique Reflections                | 2736           | 2910           |
| Observe data [ $I > 2\sigma(I)$ ] | 2736           | 2549           |
| R(int)                            | 0.1766         | 0.0336         |
| R1, wR2 (all data)                | 0.1382, 0.1948 | 0.0695, 0.1883 |
| R1, wR2 [ $I > 2\sigma(I)$ ]      | 0.0867, 0.1738 | 0.0621, 0.1796 |

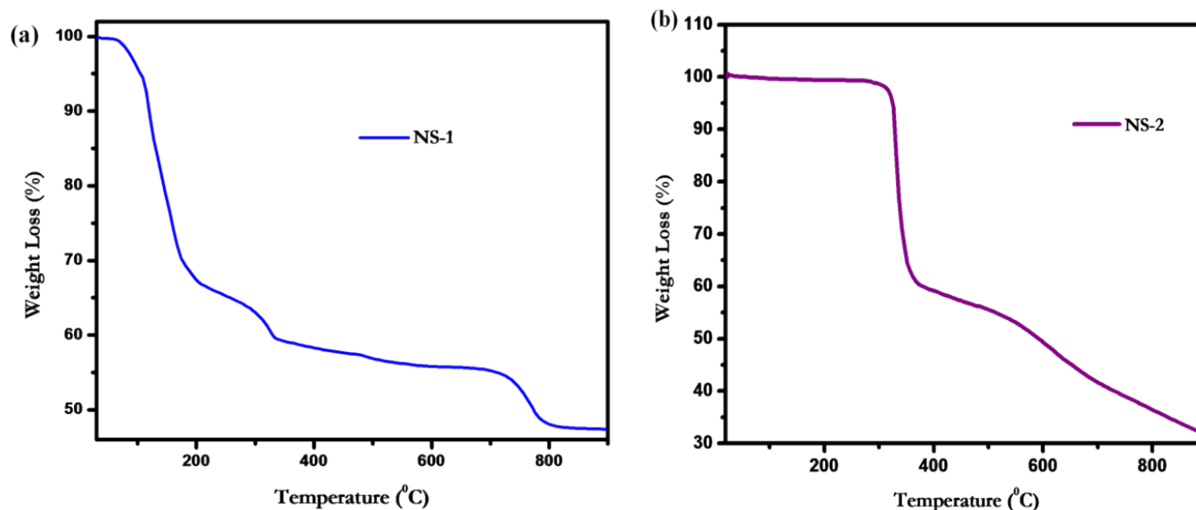

Figure S11: TGA data of (a) NS-1 and (b) NS-2

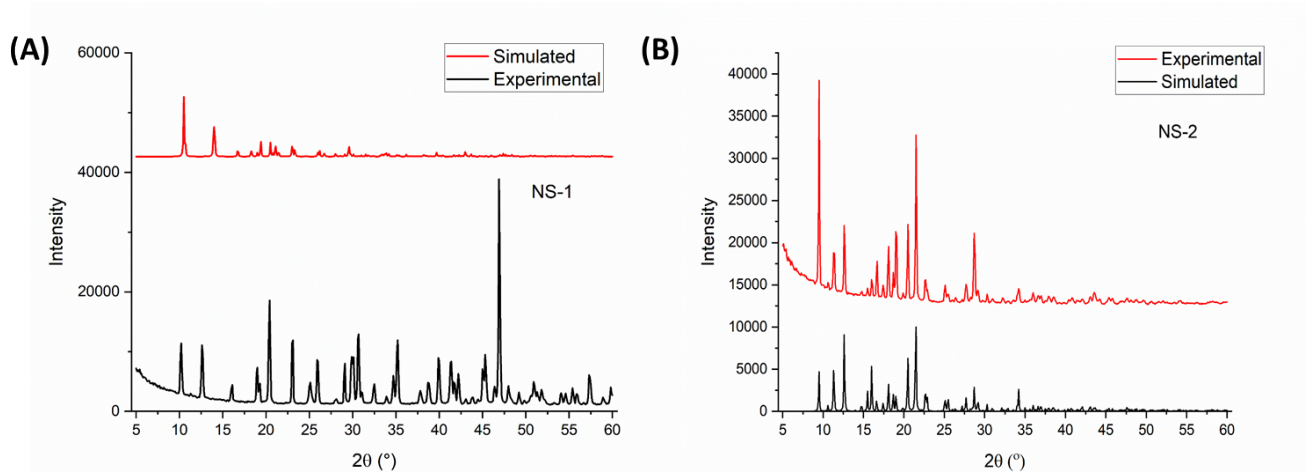

Figure S12: Comparison between P-XRD pattern of experimental data and simulated data of (A) NS-1 (B) NS-2.

The sharp band at  $2066\text{ cm}^{-1}$  corresponds to the azide ion. The C-H bands are at  $3088\text{ cm}^{-1}$  and  $2973\text{ cm}^{-1}$ , broad band at  $2816\text{ cm}^{-1}$  corresponds to -OH of the protonated Schiff base ligand. Band at  $1752\text{ cm}^{-1}$  corresponds to the C-N bond of the Schiff base, another band at  $1603\text{ cm}^{-1}$  corresponds to the C-O of acetate ion which is directly attached with Zn in **NS-1**.

On the other hand, the broad band at  $3373\text{ cm}^{-1}$  corresponds to the protonated -OH of the Schiff base in complex-2 (**NS-2**). Medium band in the region  $2988\text{-}2909\text{ cm}^{-1}$  correspond to the C-H stretching frequency. The band in the region  $1074\text{-}1191\text{ cm}^{-1}$  corresponds to the  $\text{ClO}_4^-$ . Strong band at  $1660\text{ cm}^{-1}$  corresponds to the C-N of the Schiff base.

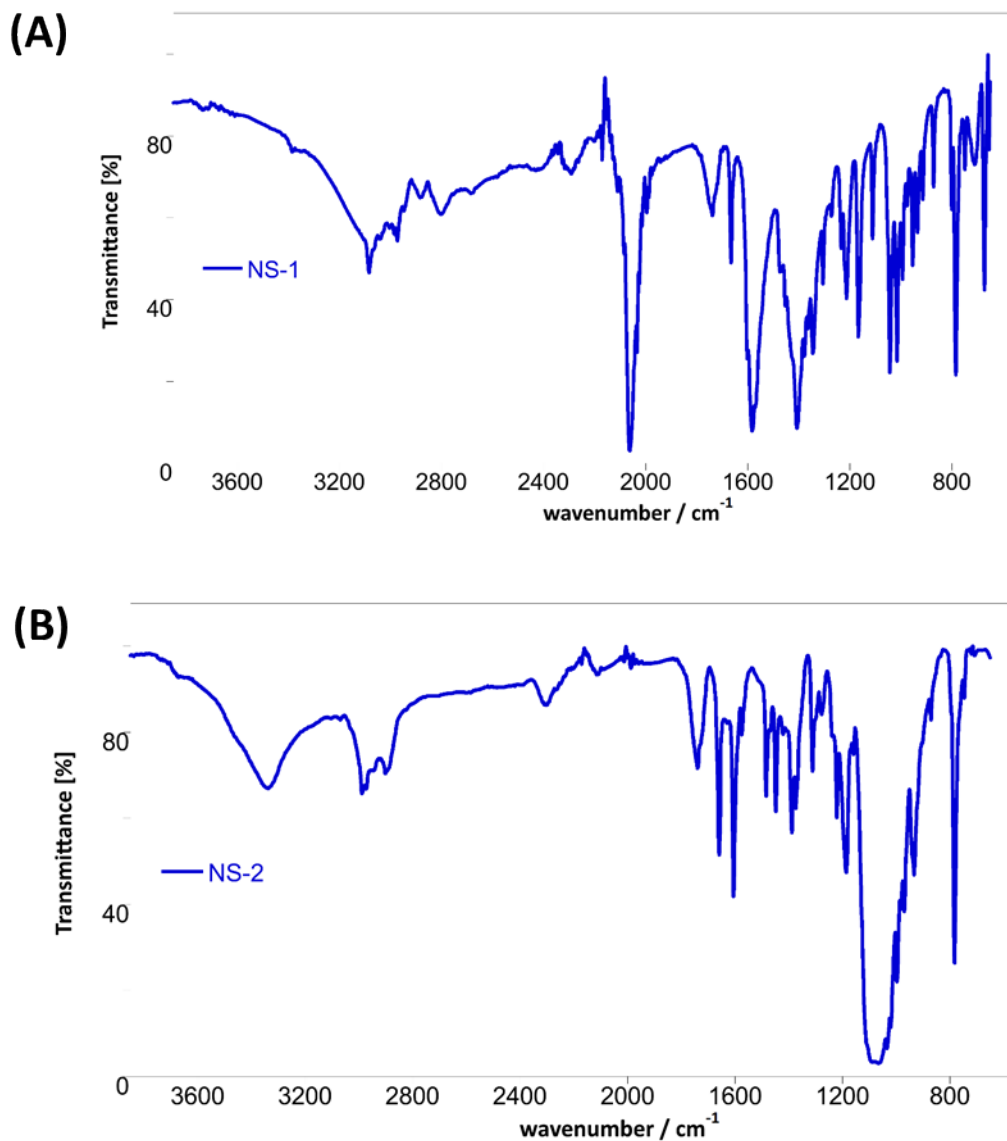

Figure S13: FT-IR spectra of the (A) NS-1 (B) NS-2

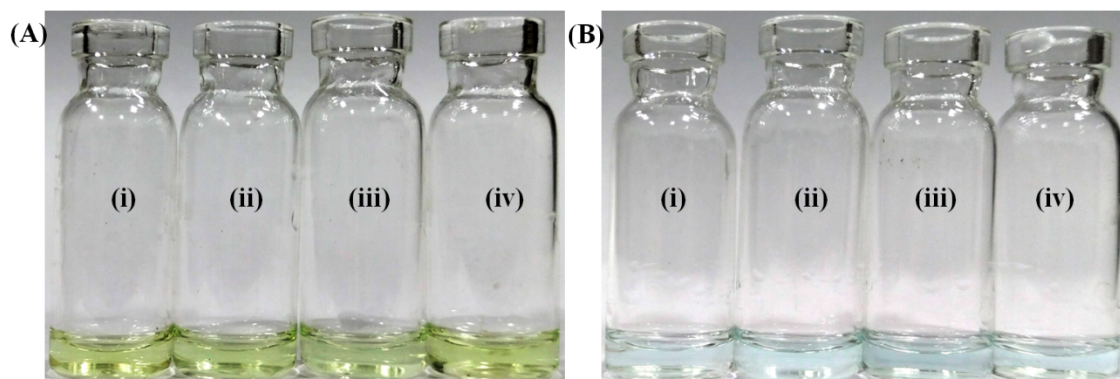

**Figure S14:** Chromogenic changes of **(A) NS-1** and **(B) NS-2** in presence of **(i) nitrate**, **(ii) sulfate**, **(iii) chloride** and **(iv) perchlorate** salt of copper.

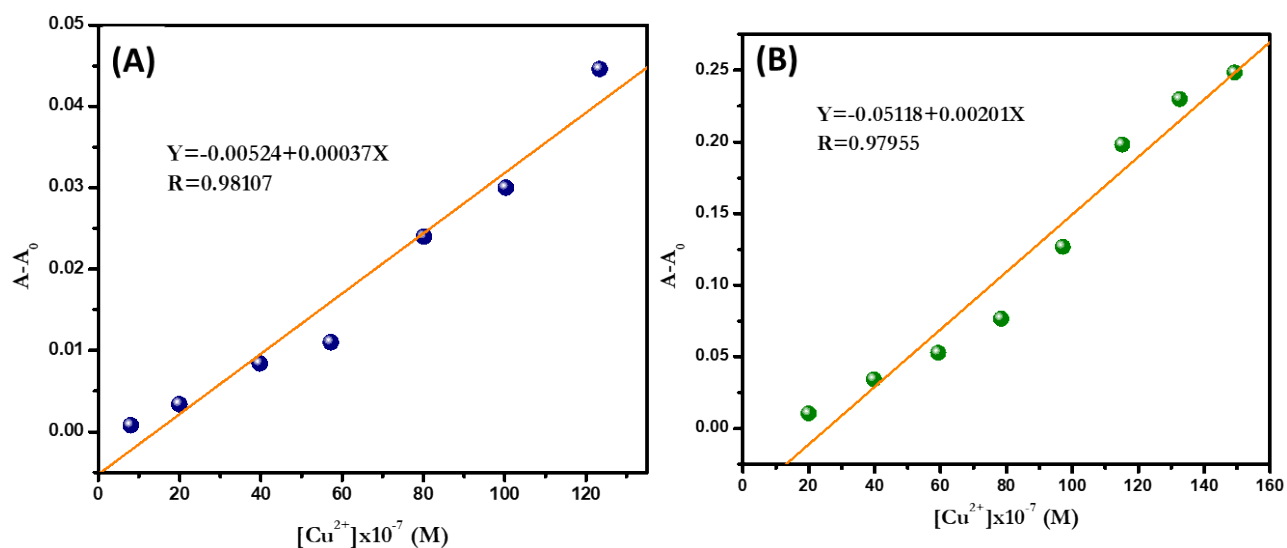

**Figure S15:** Change of absorbance at **(A) 395 nm** and **(B) 295 nm** as the linear function of the concentration of  $\text{Cu}^{2+}$  for the calculation of LOD for  $\text{Cu}^{2+}$  by **NS-1** and **NS-2** respectively.

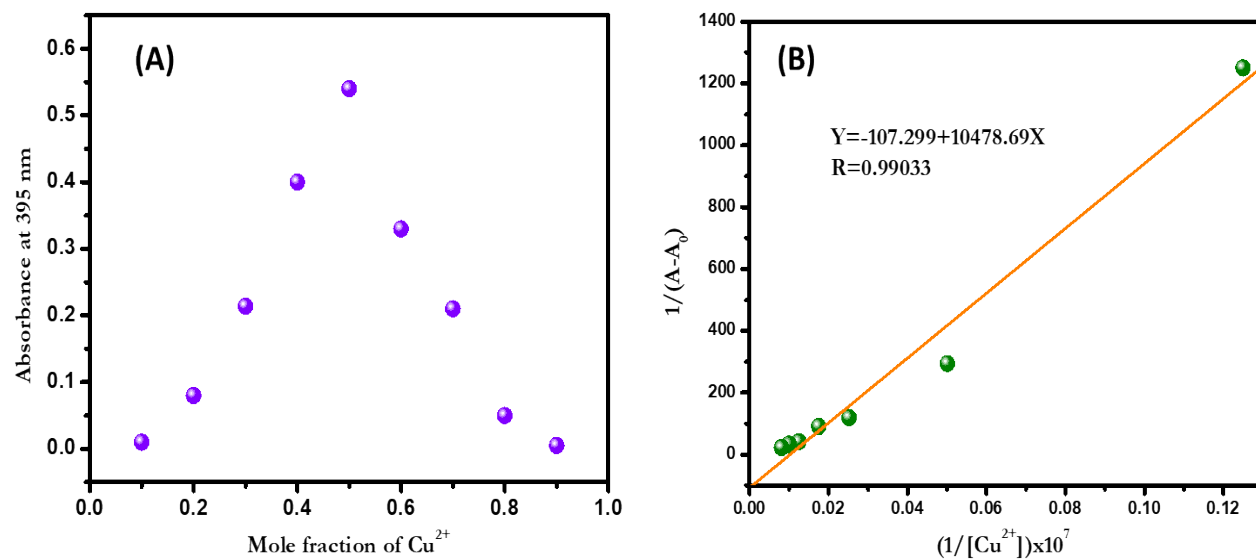

**Figure S16:** (A) Job's plot of NS-1 with  $\text{Cu}^{2+}$  for the stoichiometry determination monitoring the change of absorbance at 395 nm (B) Benesi-Hildebrand plot for absorbance of  $\text{Cu}^{2+}$  with NS-1 for the association constant determination.

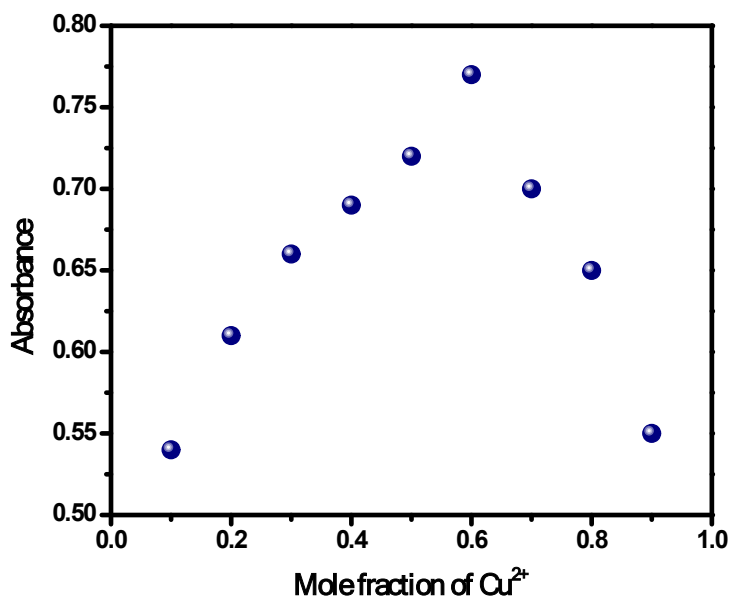

**Figure S17:** Job's plot of NS-2 with  $\text{Cu}^{2+}$  for the stoichiometry determination monitoring the change of absorbance at 295 nm.

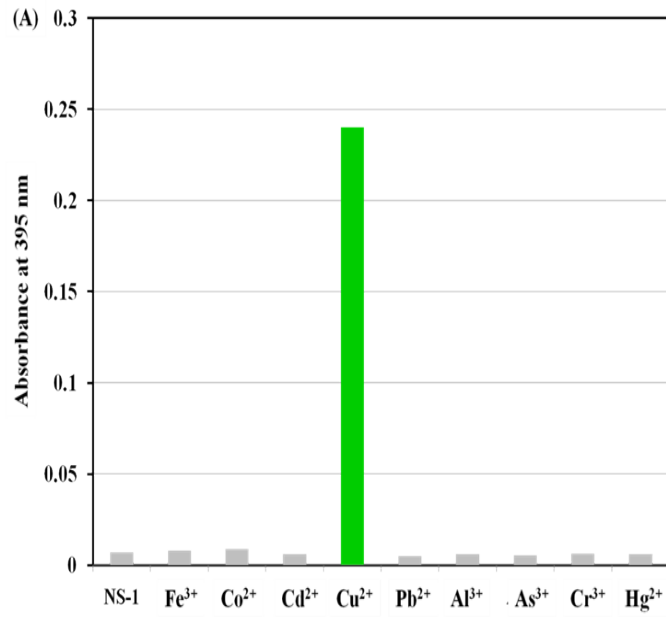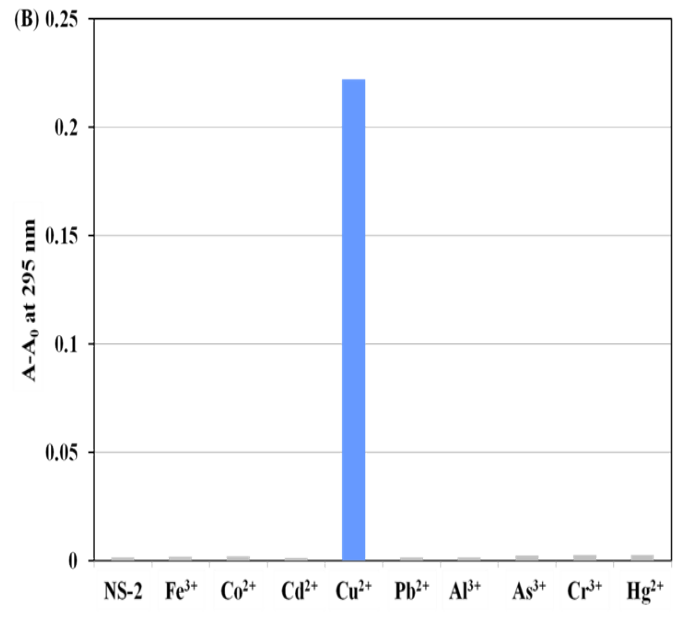

Figure S18: Selectivity of (A) NS-1 and (B) NS-2 toward Cu<sup>2+</sup>.



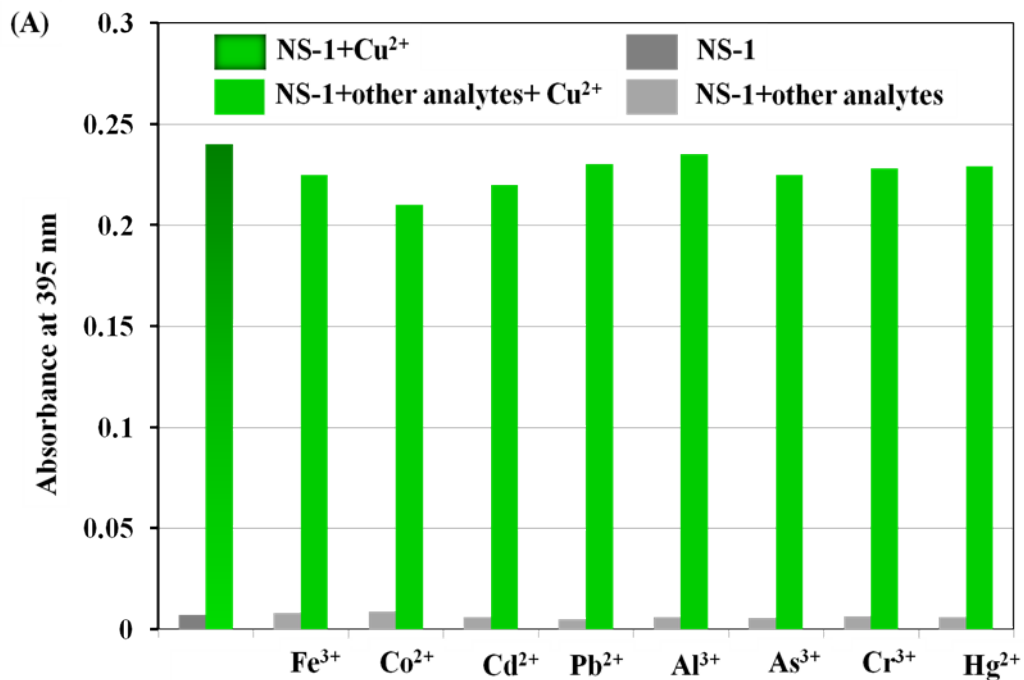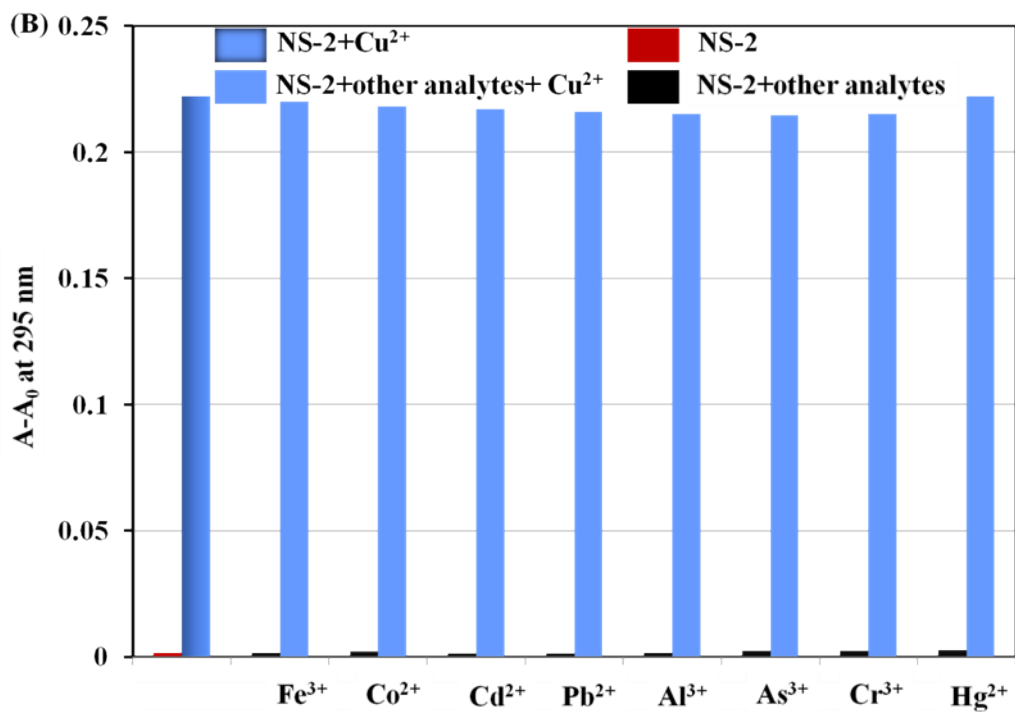

**Figure S19:** Cross-interference studies of (A) NS-1 and (B) NS-2 toward Cu<sup>2+</sup> in presence of other competing cations in similar environment.

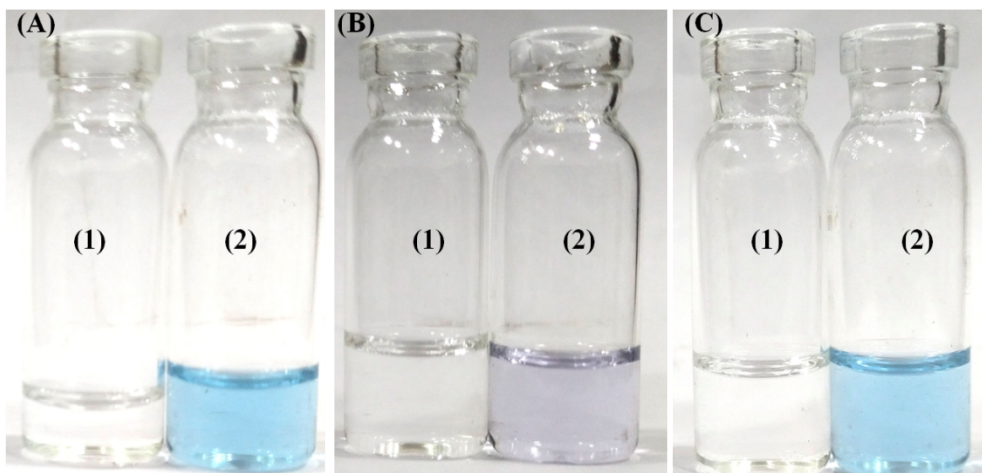

**Figure S20:** Naked eye chromogenic changes of (A) (1) pyridine-2-aldehyde, (2) pyridine-2-aldehyde+Cu<sup>2+</sup>, (B) (1) 2-amino-2 methyl-1-propanol, (2) 2-amino-2 methyl-1-propanol +Cu<sup>2+</sup> and (C) (1) in-situ generated ligand (2) in-situ generated ligand+Cu<sup>2+</sup>.

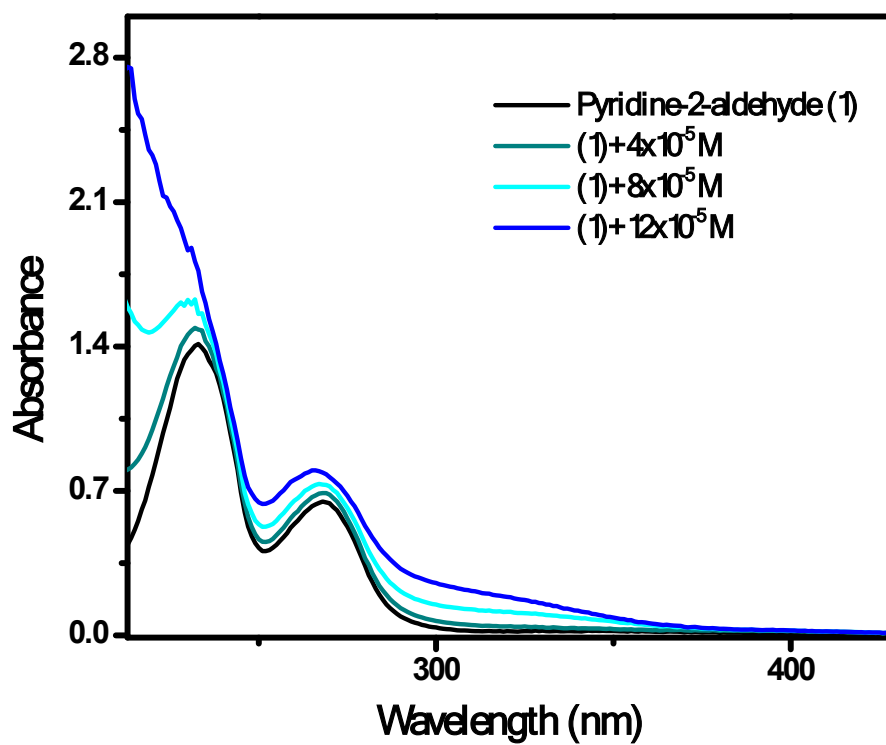

**Figure S21:** UV-Vis spectral change of pyridine-2-aldehyde in presence of Cu<sup>2+</sup>

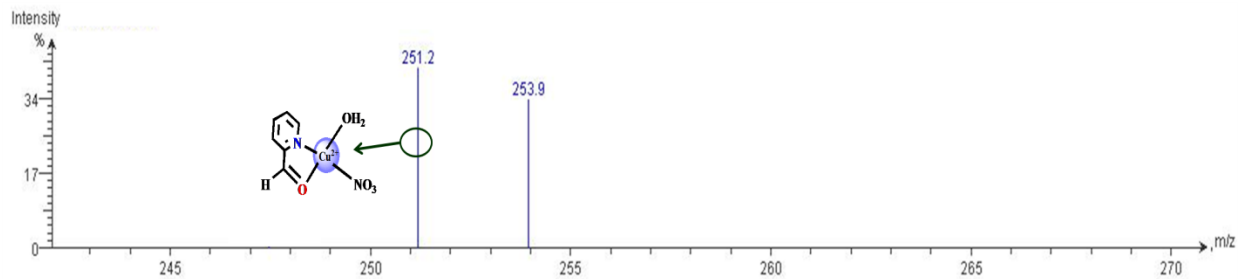

**Figure S22:** ESI-MS data of NS-2 after interaction with Cu<sup>2+</sup>.

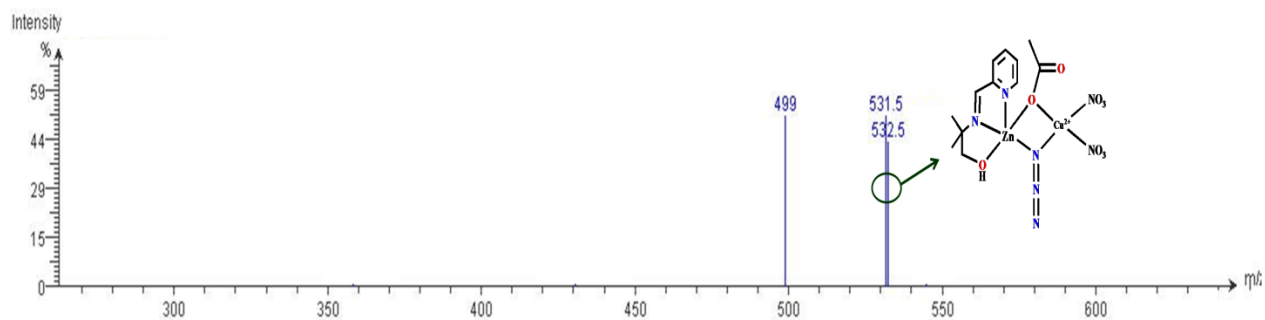

**Figure S23:** ESI-MS data of NS-1 after interaction with Cu<sup>2+</sup>.

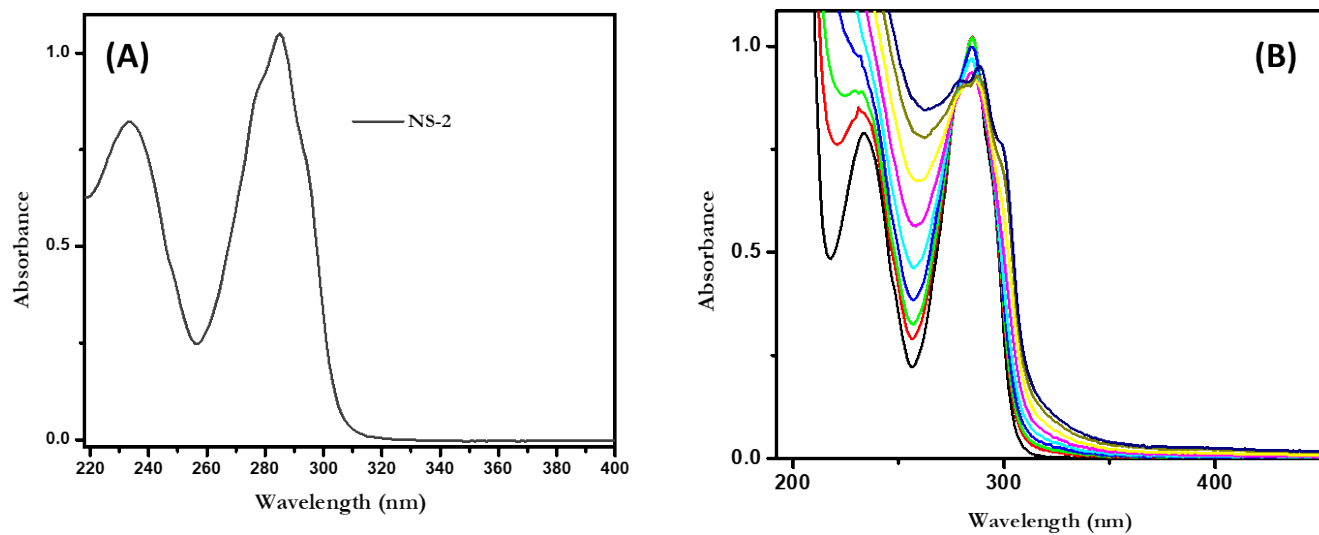

**Figure S24:** (A) UV-Vis absorption spectrum of NS-2 (100 μM) in acetonitrile (B) UV-Vis spectral alteration of 10 μM NS-2 in acetonitrile in presence of 10 μM Cu<sup>2+</sup>-spiked human urine sample.

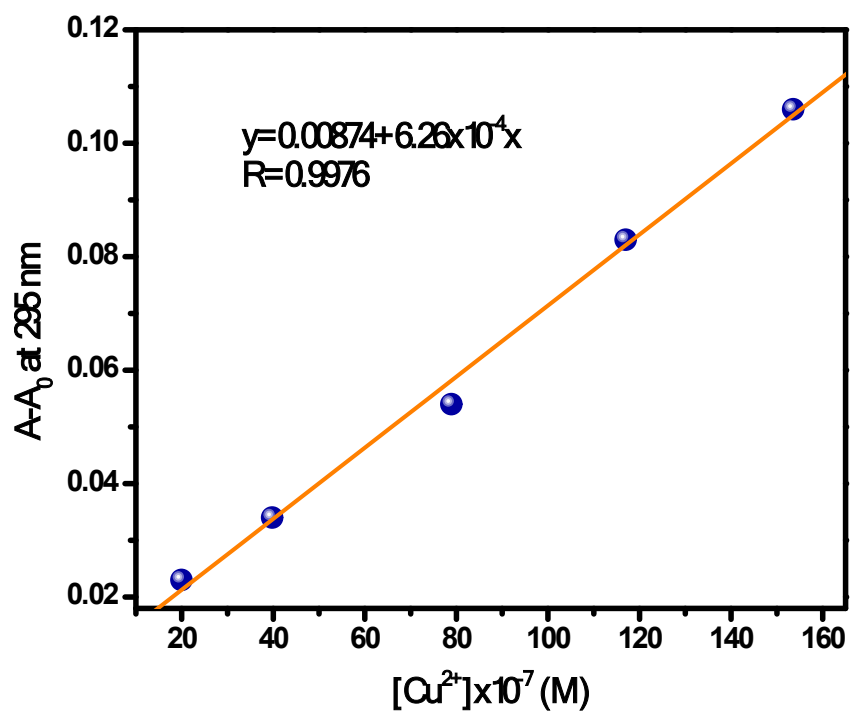

**Figure S28:** Change of absorbance at 295 nm as the linear function of the concentration of Cu<sup>2+</sup> for the calculation of LOD of NS-2 toward Cu<sup>2+</sup> in human urine sample.

**Table S12:** Comparative literature survey of the recently developed complex based chemosensors for the detection of Cu<sup>2+</sup>

| Entry | Solvent Medium                   | LOD     | Solid state detection | Detection from real field sample | Cu <sup>2+</sup> detection from human urine: A potential biomarker sensor for Wilson's disease diagnosis | Ref. |
|-------|----------------------------------|---------|-----------------------|----------------------------------|----------------------------------------------------------------------------------------------------------|------|
| 1.    | H <sub>2</sub> O/DMSO =9/1 (v/v) | 4.6 nM  | No                    | No                               | No                                                                                                       | X1   |
| 2.    | Buffer solution                  | 77 nM   | No                    | Yes                              | No                                                                                                       | X2   |
| 3.    | HEPES-buffer                     | 2.77 μM | No                    | No                               | No                                                                                                       | X3   |
| 4.    | H <sub>2</sub> O with 0.5% DMSO  | 6.1 μM  | Yes                   | Yes                              | No                                                                                                       | X4   |
| 5.    | H <sub>2</sub> O/EtOH (7: 3 v/v) | -       | No                    | Yes                              | No                                                                                                       | X5   |
| 6.    | HEPES buffered (pH 7.0, 10 mM)   | -       | No                    | No                               | No                                                                                                       | X6   |

|     |                                                         |                               |     |     |     |              |
|-----|---------------------------------------------------------|-------------------------------|-----|-----|-----|--------------|
|     | water                                                   |                               |     |     |     |              |
| 7.  | THF/H <sub>2</sub> O, (1/1 v/v)                         | 8.95×10 <sup>-8</sup> M       | Yes | Yes | No  | X7           |
| 8.  | CH <sub>3</sub> CN:H <sub>2</sub> O = 7:3 v/v           | 1.53 μM                       | No  | No  | No  | X8           |
| 9.  | H <sub>2</sub> O                                        | 20 μM                         | Yes | Yes | No  | X9           |
| 10. | Acetonitrile-water (1:1)                                | 0.03 μM                       | Yes | Yes | No  | X10          |
| 11. | CH <sub>3</sub> CN                                      | 0.08 μM                       | No  | No  | No  | X11          |
| 12. | (HEPES:CH <sub>3</sub> CN (1:1), pH 7.4                 | 5 nM                          | No  | Yes | No  | X12          |
| 13. | CH <sub>3</sub> CN–H <sub>2</sub> O solution (4:1, v/v) | -                             | No  | No  | No  | X13          |
| 14. | MeCN/ H <sub>2</sub> O (9/1)                            | -                             | No  | No  | No  | X14          |
| 15. | H <sub>2</sub> O                                        | NS-1: 48.6 fM<br>NS-2: 2.4 μM | Yes | Yes | Yes | Present work |

## References:

- X1 Y.W. Sie, C.F. Wan, A.T. Wu, *RSC Adv.*, 2017, **7**, 2460-2465.
- X2 N. Wang, Y. Liu, Y. Li, Q. Liu, M. Xie, *Sens. Actuators B Chem.*, 2018, **255**, 78-86.
- X3 Y. Fu, Q. C. Feng, X. J. Jiang, H. Xu, M. Li, S. Q. Zang, *Dalton Trans.*, 2014, **43**, 5815-5823.
- X4 Y.W. Sie, C.L. Li, C.F. Wan, J.H. Chen, C.H. Hu, H. Yan, A.T. Wu, *Inorg. Chim. Acta*, 2017, **467**, 325-329.
- X5 M.A. Wani, N. Thakur, M.D. Pandey, R. Pandey, *New J. Chem.*, 2017, **41**, 10000-10008.
- X6 M. G. Choi, S. Cha, H. Lee, H. L. Jeon, S. K. Chang, *Chem. Commun.*, 2009, 7390-7392.
- X7 L. Hou, X. Kong, Y. Wang, J. Chao, C. Li, S. Dong, y. Wang, S. Shuang, *J. Mater. Chem. B*, 2017, **5**, 8957-8966.
- X8 A. K. Mahapatra, S. Mondal, S. K. Manna, K. Maiti, R. Maji, M. R. Uddin, S. Mandal, D. Sarkar, T. K. Mondal, D. K. Maiti, *Dalton Trans.*, 2015, **44**, 6490-6501.
- X9 Z. Quing, Z. Mao, T. Qing, X. He, Z. Zou, D. He, H. Shi, J. Huang, J. Liu, K. Wang, *Anal. Chem.*, 2014, **86**, 11263–11268.
- X10 N. Dey, J. Kulhanek, F. Bures, S. Bhattacharya, *J. Org. Chem.*, 2019, **84**, 1787–1796.
- X11 X. He, J. Zhang, X. Liu, L. Dong, D. Li, H. Qiu, S. Yin, *Sens. Actuators B Chem.*, 2014, **192**, 29-35.
- X12 A. Kumar, S. Kumar, P. S. Chae, *Dyes and Pigm.*, 2020, **181**, 108522.
- X13 Y. Yang, C. Gao, B. Li, L. Xu, L. Duan, *Sens. Actuators B Chem.*, 2014, **199**, 121-126.
- X14 S. Malkondu, S. Erdemir, *Tetrahedron*, 2014, **70**, 5494-5498.
